# Supplementary material for: Visible-light-driven valorization of biomass-derived furfuryl alcohol to diesel precursors with simultaneous H 2 evolution over a dual functional In 2 S 3 –Zn 5 In 2 S 8 photocatalyst
Source: Royal Society of Chemistry journal article supplement (doi:10.1039/d5gc04034e), 2025-10-21
Supplement: d5gc04034e1.pdf [file d5gc04034e1.pdf]

**Visible-light-driven valorization of biomass-derived furfuryl alcohol to diesel precursors with simultaneous H<sub>2</sub> evolution over dual functional In<sub>2</sub>S<sub>3</sub>-Zn<sub>5</sub>In<sub>2</sub>S<sub>8</sub> photocatalysts**

Yibei Zhang, Hongyun Lu, Xuekai-Qu, Lunan Wu, Zhenghao Song, Xinyi Ding, Peng Li, Xiu-Jie Yang\*, Dong Liu

*State Key Laboratory of Heavy Oil Processing, China University of Petroleum (East China), Qingdao 266580, China*

**\* Corresponding author**

Mailing Address: State Key Laboratory of Heavy Oil Processing, College of Chemistry and Chemical Engineering, China University of Petroleum (East China), Qingdao, Shandong 266580, China.

E-mail: [yangxiujie@upc.edu.cn](mailto:yangxiujie@upc.edu.cn) (X.-J. Yang)

Tel.: +86-532-86984615

## Methods

|                                                                          |   |
|--------------------------------------------------------------------------|---|
| Synthesis of $\text{In}_2\text{S}_3$ .....                               | 3 |
| Synthesis of $\text{Zn}_5\text{In}_2\text{S}_8$ (ZIS <sub>8</sub> )..... | 3 |

## Figure of contents

|                                                                                                                                                          |   |
|----------------------------------------------------------------------------------------------------------------------------------------------------------|---|
| Figure S1 The Raman spectra of $\text{In}_2\text{S}_3$ -ZIS <sub>8</sub> catalysts. ....                                                                 | 4 |
| Figure S2 $\text{N}_2$ adsorption/desorption isotherms of $\text{In}_2\text{S}_3$ , ZIS <sub>8</sub> and $\text{In}_2\text{S}_3$ -ZIS <sub>8</sub> ..... | 4 |
| Figure S3 Pore size distribution of $\text{In}_2\text{S}_3$ , ZIS <sub>8</sub> and $\text{In}_2\text{S}_3$ -ZIS <sub>8</sub> . ....                      | 5 |
| Figure S4 The Mott-Schottky measurement of (a) $\text{In}_2\text{S}_3$ , (b)ZIS <sub>8</sub> and (c) $\text{In}_2\text{S}_3$ -ZIS <sub>8</sub> . ....    | 5 |
| Figure S5 photocurrent spectra of $\text{In}_2\text{S}_3$ , ZIS <sub>8</sub> and $\text{In}_2\text{S}_3$ -ZIS <sub>8</sub> .....                         | 6 |
| Figure S6 FT-IR spectra of $\text{In}_2\text{S}_3$ -ZIS <sub>8</sub> catalyst before and after recycling. ....                                           | 6 |

## Table of contents

|                                                                                                                                                                           |    |
|---------------------------------------------------------------------------------------------------------------------------------------------------------------------------|----|
| Table S1 Different surface atom contents derived from XPS analysis for the $\text{In}_2\text{S}_3$ , ZIS <sub>8</sub> and $\text{In}_2\text{S}_3$ -ZIS <sub>8</sub> ..... | 7  |
| Table S2 ICP-OES results of ZIS <sub>8</sub> and $\text{In}_2\text{S}_3$ -ZIS <sub>8</sub> .....                                                                          | 7  |
| Table S3 Physicochemical properties of $\text{In}_2\text{S}_3$ , ZIS <sub>8</sub> and $\text{In}_2\text{S}_3$ -ZIS <sub>8</sub> .....                                     | 7  |
| Table S4 Photocatalytic coupling of furfuryl alcohol under different experimental condition <sup>[a]</sup> . ....                                                         | 8  |
| Table S5 Photocatalytic performance of $\text{In}_2\text{S}_3$ -ZIS <sub>8</sub> with various substrates <sup>[a]</sup> .....                                             | 9  |
| Table S6 Photocatalytic coupling of furfuryl alcohol under different synthesis method <sup>[a]</sup> .....                                                                | 9  |
| Table S7 Comparison of $\text{In}_2\text{S}_3$ -ZIS <sub>8</sub> and previously reported photocatalytic systems. ....                                                     | 10 |

## Method

### Synthesis of $\text{In}_2\text{S}_3$

A mixture of  $\text{InCl}_3$  (2 mmol) and  $\text{CH}_3\text{CSNH}_2$  (6 mmol) was dissolved in 80 mL of deionized water under continuous stirring until complete dissolution. Subsequently, CTAB (1 mmol) was added, and the solution was stirred for an additional 1 h. The resulting mixture was transferred to a Teflon-lined autoclave and heated at  $180^\circ\text{C}$  for 12 h. After cooling to room temperature, the precipitate was collected by centrifugation, washed three times with deionized water and ethanol, and finally dried in a vacuum oven at  $50^\circ\text{C}$  for 12 h.

### Synthesis of $\text{Zn}_5\text{In}_2\text{S}_8$ ( $\text{ZIS}_8$ )

A mixture of  $\text{Zn}(\text{OAc})_2 \cdot 2\text{H}_2\text{O}$  (5 mmol),  $\text{InCl}_3$  (2 mmol), and  $\text{CH}_3\text{CSNH}_2$  (16 mmol) was dissolved in 80 mL of deionized water under continuous stirring until complete dissolution. Subsequently, CTAB (1 mmol) was added, and the solution was stirred for an additional 1 h. The resulting mixture was transferred to a Teflon-lined autoclave and heated at  $180^\circ\text{C}$  for 12 h. After cooling to room temperature, the precipitate was collected by centrifugation, washed three times with deionized water and ethanol, and finally dried in a vacuum oven at  $50^\circ\text{C}$  for 12 h.

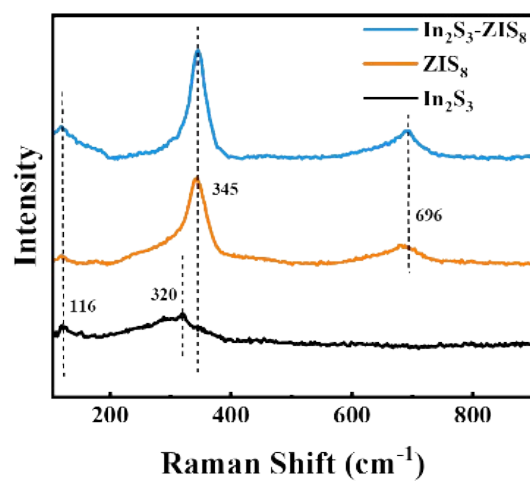

**Figure S1** The Raman spectra of  $\text{In}_2\text{S}_3$ - $\text{ZIS}_8$  catalysts.

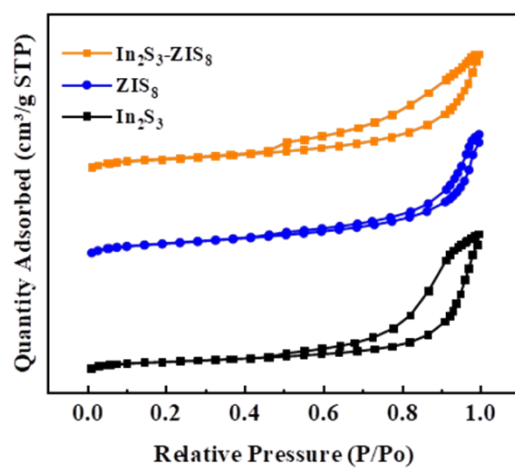

**Figure S2**  $\text{N}_2$  adsorption/desorption isotherms of  $\text{In}_2\text{S}_3$ ,  $\text{ZIS}_8$  and  $\text{In}_2\text{S}_3$ - $\text{ZIS}_8$ .

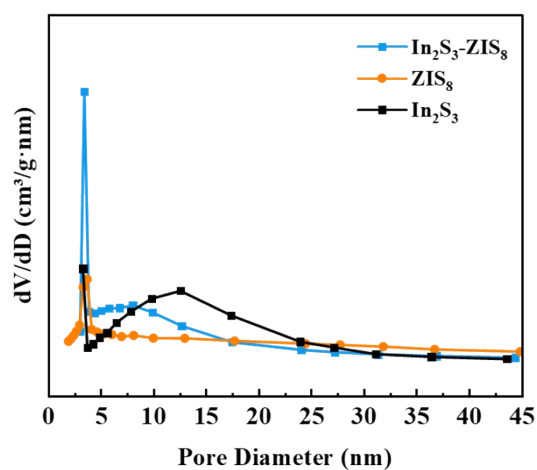

**Figure S3** Pore size distribution of  $\text{In}_2\text{S}_3$ ,  $\text{ZIS}_8$  and  $\text{In}_2\text{S}_3\text{-ZIS}_8$ .

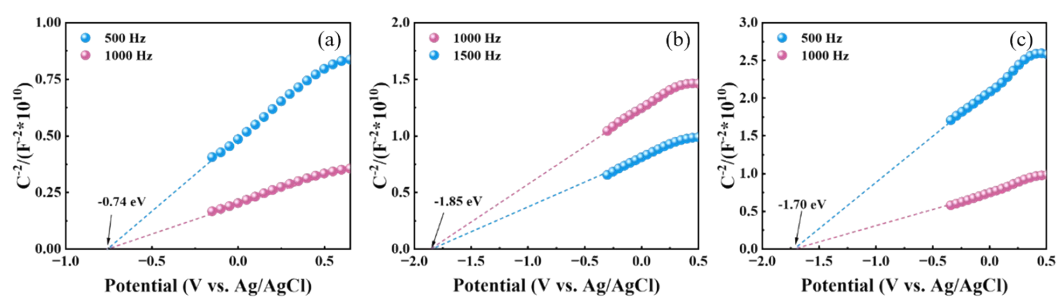

**Figure S4** The Mott-Schottky measurement of (a)  $\text{In}_2\text{S}_3$ , (b)  $\text{ZIS}_8$  and (c)  $\text{In}_2\text{S}_3\text{-ZIS}_8$ .

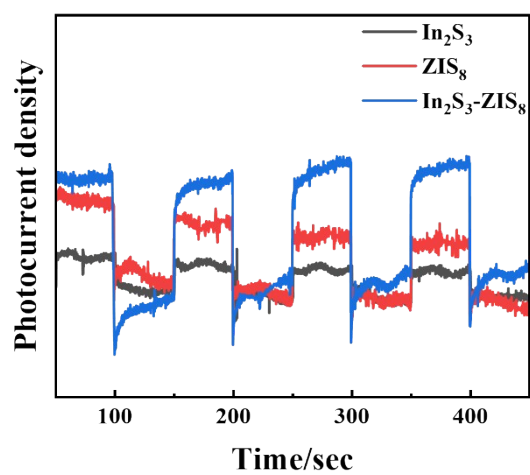

**Figure S5** photocurrent spectra of  $\text{In}_2\text{S}_3$ ,  $\text{ZIS}_8$  and  $\text{In}_2\text{S}_3\text{-ZIS}_8$ .

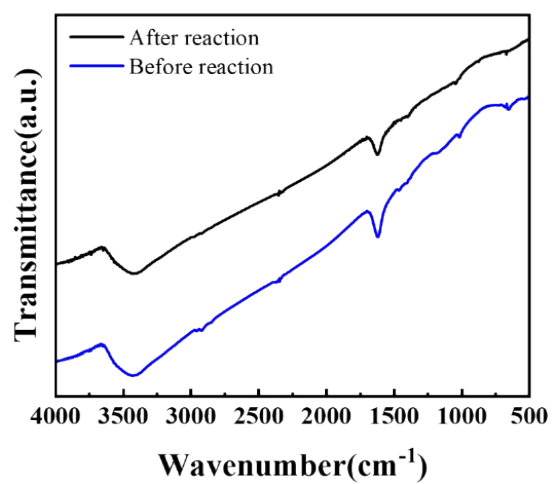

**Figure S6** FT-IR spectra of  $\text{In}_2\text{S}_3\text{-ZIS}_8$  catalyst before and after recycling.

**Table S1** Different surface atom contents derived from XPS analysis for the  $\text{In}_2\text{S}_3$ ,  $\text{ZIS}_8$  and  $\text{In}_2\text{S}_3\text{-ZIS}_8$ .

| Sample                               | Zn/ at. % | In/ at. % | S/ at. % | Zn:In:S  |
|--------------------------------------|-----------|-----------|----------|----------|
| $\text{In}_2\text{S}_3$              | —         | 43.36     | 56.64    | 3:4      |
| $\text{ZIS}_8$                       | 25.68     | 19.31     | 55.00    | 4:3:9    |
| $\text{In}_2\text{S}_3\text{-ZIS}_8$ | 24.43     | 22.46     | 53.11    | 12:11:26 |

**Table S2** ICP-OES results of  $\text{ZIS}_8$  and  $\text{In}_2\text{S}_3\text{-ZIS}_8$ .

| Sample                               | Zn/ wt. % | In/ wt. % | Zn:In     |
|--------------------------------------|-----------|-----------|-----------|
| $\text{ZIS}_8$                       | 22.7      | 13.00     | 0.35:0.11 |
| $\text{In}_2\text{S}_3\text{-ZIS}_8$ | 15.25     | 18.05     | 0.23:0.16 |

**Table S3** Physicochemical properties of  $\text{In}_2\text{S}_3$ ,  $\text{ZIS}_8$  and  $\text{In}_2\text{S}_3\text{-ZIS}_8$ .

| Catalyst                             | BET surface area<br>( $\text{m}^2\cdot\text{g}^{-1}$ ) | Pore volume<br>( $\text{cm}^3\cdot\text{g}^{-1}$ ) | Pore size<br>(nm) |
|--------------------------------------|--------------------------------------------------------|----------------------------------------------------|-------------------|
| $\text{In}_2\text{S}_3$              | 22.38                                                  | 0.145                                              | 12.035            |
| $\text{ZIS}_8$                       | 34.97                                                  | 0.129                                              | 12.317            |
| $\text{In}_2\text{S}_3\text{-ZIS}_8$ | 30.51                                                  | 0.124                                              | 8.785             |

**Table S4** Photocatalytic coupling of furfuryl alcohol under different experimental condition<sup>[a]</sup>.

| Entry            | solvent            | C-C coupling Product   |                          |
|------------------|--------------------|------------------------|--------------------------|
|                  |                    | Conv./% <sup>[b]</sup> | Select./% <sup>[c]</sup> |
| 1 <sup>[d]</sup> | CH <sub>3</sub> CN | 6.6                    | —                        |
| 2 <sup>[e]</sup> | CH <sub>3</sub> CN | 12.4                   | 9.5                      |
| 3 <sup>[f]</sup> | CH <sub>3</sub> CN | 90.3                   | 67.3 <sup>[g]</sup>      |
| 4                | CH <sub>3</sub> CN | 88.6                   | 87.1                     |
| 5 <sup>[h]</sup> | CH <sub>3</sub> CN | 61.5                   | 91.1                     |
| 6                | H <sub>2</sub> O   | 35.7                   | 92.6                     |
| 7                | Acetone            | 23.3                   | 91.2                     |
| 8                | Methanol           | 66.2                   | 87.7                     |
| 9                | DCM                | 55.8                   | 29.1                     |
| 10               | Toluene            | 85.7                   | 68.3                     |

[a] Light source: LED (blue, 460 nm); room temperature; substrate amount: 0.46 mmol; 1 atm N<sub>2</sub>; 5 mL CH<sub>3</sub>CN; 24h. [b] Conversion of furfuryl alcohol were determined by GC analysis; [c] Selectivity of hydrofuroin were determined by GC analysis; [d] Without photocatalyst; [e] Without irradiation; [f] Using 1 atm O<sub>2</sub> instead of N<sub>2</sub>; [g] Selectivity for furfural; [h] Without CTAB.

**Table S5** Photocatalytic performance of In<sub>2</sub>S<sub>3</sub>-ZIS<sub>8</sub> with various substrates<sup>[a]</sup>.

| Entry | Substrate                | C-C coupling Product   |                          |
|-------|--------------------------|------------------------|--------------------------|
|       |                          | Conv./% <sup>[b]</sup> | Select./% <sup>[b]</sup> |
| 1     | 5-Methyl-2-furanmethanol | 82.2                   | 78.1                     |
| 2     | benzyl alcohol           | ≈ 100                  | 61.5                     |
| 3     | 4-Bromobenzyl alcohol    | ≈ 100                  | 78.3                     |
| 4     | 4-Methylbenzyl alcohol   | 89.8                   | 65.4                     |
| 5     | 4-Fluorobenzyl alcohol   | ≈ 100                  | 75.0                     |
| 6     | 4-Methoxybenzyl alcohol  | ≈ 100                  | 80.9                     |
| 7     | benzaldehyde             | 76.3                   | 63.3                     |

[a] Light source: LED (blue, 460 nm); room temperature; substrate amount: 0.46 mmol; 1 atm N<sub>2</sub>; 5 mL CH<sub>3</sub>CN; [b] Determined by gas chromatograph with n-dodecanol as internal standard.

**Table S6** Photocatalytic coupling of furfuryl alcohol under different synthesis method<sup>[a]</sup>.

| Entry            | solvent            | C-C coupling Product   |                          |
|------------------|--------------------|------------------------|--------------------------|
|                  |                    | Conv./% <sup>[b]</sup> | Select./% <sup>[c]</sup> |
| 1 <sup>[d]</sup> | CH <sub>3</sub> CN | 12.1                   | 62.9                     |
| 2 <sup>[e]</sup> | CH <sub>3</sub> CN | 25.2                   | 70.2                     |
| 3 <sup>[f]</sup> | CH <sub>3</sub> CN | 88.6                   | 87.1                     |

[a] Light source: LED (blue, 460 nm); room temperature; substrate amount: 0.46 mmol; 1 atm N<sub>2</sub>; 5 mL CH<sub>3</sub>CN; 24h. [b] Conversion of furfuryl alcohol were determined by GC analysis; [c] Selectivity of hydrofuroin were determined by GC analysis; [d] Mechanically mixed sample; [e] Low-temperature solvothermal sample; [f] Hydrothermal sample.

**Table S7** Comparison of In<sub>2</sub>S<sub>3</sub>-ZIS<sub>8</sub> and previously reported photocatalytic systems.

| Photocatalysts                                       | Reaction conditions                                                                           | Conv./% | Select./% | H <sub>2</sub> rate                       | Reference |
|------------------------------------------------------|-----------------------------------------------------------------------------------------------|---------|-----------|-------------------------------------------|-----------|
| In <sub>2</sub> S <sub>3</sub> -ZIS <sub>8</sub>     | LED (blue, 460 nm), 0.46 mmol FA, 5 mL CH <sub>3</sub> CN                                     | 88.6    | 87.1      | 14408.6 μmol·g <sup>-1</sup>              | This work |
| ZIS/Ni                                               | 300 W Xe lamp, 76.9 μmol BA, 5 mL CH <sub>3</sub> CN                                          | 86      | 99        | 42.24 μmol                                | 2         |
| Mo/MCS/Co                                            | 300 W Xe lamp, 50 0.48 mmol BA, 10 mL CH <sub>3</sub> CN                                      | 90      | 98        | 1.83 mmol g <sup>-1</sup> h <sup>-1</sup> | 3         |
| Ni-ZIS                                               | 300 W Xe lamp, 5 mM FA                                                                        | 90      | 12        | 583 μmol g <sup>-1</sup> h <sup>-1</sup>  | 4         |
| Zn <sub>3</sub> In <sub>2</sub> S <sub>6</sub> -STAB | 300 W Xe lamp, 0.35 mmol FA, 5 mL CH <sub>3</sub> CN                                          | 96.6    | 74.8      | —                                         | 5         |
| ZnIn <sub>2</sub> S <sub>4</sub>                     | 300 W Xe lamp, 0.1 mmol BA, 10 mL CH <sub>3</sub> CN                                          | 80      | ~80       | —                                         | 6         |
| Zn <sub>0.6</sub> Cd <sub>0.4</sub> S                | 300 W Xe lamp, 10 mM BA, 10 mM scavenger, 7 mL of CH <sub>3</sub> CN, 3 mL of deionized water | 77.14   | 81.19     | 22 μmol                                   | 7         |
| In(0.1)-ZnS                                          | 365 nm LED light, 192 mol BA, 4.0 mL CH <sub>3</sub> CN                                       | 73      | 100       | 60 μmol                                   | 8         |
| CdS                                                  | 365 nm LED light, 192 mol BA, 4.0 mL CH <sub>3</sub> CN                                       | 23      | 76        | —                                         | 8         |
| CdS/TNS                                              | 300 W Xe lamp, 0.1 mmol BA, 5 mL CH <sub>3</sub> CN                                           | 16.2    | 89.7      | 69.5 μmol g <sup>-1</sup>                 | 9         |
| Ni(OH) <sub>2</sub> -ZIS                             | 300 W Xe lamp, 10 mM HMF, 10 mL H <sub>2</sub> O                                              | 20      | 79        | 2405 μmol g <sup>-1</sup>                 | 10        |

## References

1. Y. Zhang, M. Zhang, Z. Yu, R. Liu, Y. Li, J. Xiong, Y. Qiao, R. Zhang and X. Lu, *Applied Catalysis B: Environment and Energy*, 2024, **350**, 123914.
2. J. Li, M. Qi and Y. Xu, *Chinese Journal of Catalysis*, 2022, **43**, 1084-1091.
3. J. Wang, M. Qi, X. Wang and W. Su, *Applied Catalysis B: Environmental*, 2022, **302**, 120812.
4. W. Kang, F. Guo, L. Mao, Y. Liu, C. Han and L. Yuan, *Physical Chemistry Chemical Physics*, 2023, **25**, 33175-33183.
5. S. Zhao, S. Song, Y. You, Y. Zhang, W. Luo, K. Han, T. Ding, Y. Tian and X. Li, *Molecular Catalysis*, 2022, **528**, 112429.
6. X. Leng, X. Zhou, L. Ma, Y. Du, O. Peng, Z. Chen, J. Pan, M. Qi, J. Zheng, Y. Xu and K. P. Loh, *ACS Catalysis*, 2024, **14**, 11554-11563.
7. R. Wang, Z. Zheng, Z. Li and X. Xu, *Chemical Engineering Journal*, 2024, **480**, 147970.
8. T. Shen, Q. Chen, Y. Gao, Z. Gu, H. Zhang, F. Shi, G. Liu, Y. Huo and H. Li, *Journal of Catalysis*, 2024, **440**, 115842.
9. M. Qi, Q. Lin, Z. Tang and Y. Xu, *Applied Catalysis B: Environment and Energy*, 2022, **307**, 121158.
10. W. Kang, X. Li, X. Zeng, H. Wu, Y. Ge, L. Yuan, Y. Liu and C. Han, *Chemical Communications*, 2024, **60**, 10572-10575.
